# Supplementary material
Source: Royal Society of Chemistry journal article supplement (https://www.rsc.org/suppdata/books/178801/9781788010740/bk9781788010740-erratum.pdf)
Supplement: Supplementary file 1 [file bk9781788010740-erratum.pdf]

Corrections for *Hybrid MR-PET Imaging: Systems, Methods and Applications*

© The Royal Society of Chemistry 2019

There is an error in the print copy of the book on page 375. The title of subsection 19.5.2 should have been given as 'Imaging of Vascular Targets'.
